# Supplementary material for: Multiple Introductions of Rabbit Hemorrhagic Disease Virus Lagovirus europaeus/GI.2 in Africa
Source: MDPI journal article supplement (doi:10.3390/biology10090883), 2021-09-08
Supplement: s1 [file s1]

**Table S1. List of the complete genome sequences used and GenBank accession number.**

| GenBank accession number | Strain name                          |
|--------------------------|--------------------------------------|
| AB300693                 | Hokkaido/2002/JPN_2002               |
| AF258618                 | Iowa2000_USA                         |
| AF295785                 | Mexico89_1989                        |
| AY523410                 | CD/China                             |
| DQ189077                 | Bahrain_2001                         |
| DQ189078                 | Saudi_Arabia                         |
| DQ205345                 | JX/CHA/97_China_1997                 |
| DQ280493                 | ChinaWHNRH                           |
| EF363035                 | cloneJG-RHDV-DD06_Ramsay Island_1999 |
| EF558572                 | Frankfurt12_Germany_1996             |
| EF558573                 | Frankfurt5_Germany                   |
| EF558574                 | Wika_Germany_1996                    |
| EF558575                 | Ascot_UK_1992                        |
| EF558576                 | Jena_Germany                         |
| EF558577                 | Meiningen_Germany_1993               |
| EF558578                 | Eisenhutenstadt_Germany_1989         |
| EF558579                 | NZ54_New Zealand_2003                |
| EF558580                 | NZ61_New Zealand_2003                |
| EF558581                 | Erfurt_Germany_2000                  |
| EF558582                 | Dachswald_Germany_2000               |
| EF558583                 | Triptis_Germany_1996                 |
| EF558584                 | Rossi_Germany_2002                   |
| EF558585                 | Hagenow_Germany_1990                 |
| EF558586                 | Hartmannsdorf_Germany_1989           |
| EU003578                 | IN-05_USA_2005                       |
| EU003579                 | Italy90_1990                         |
| EU003580                 | Korea90_1990                         |
| EU003581                 | NY-01_2001                           |
| EU003582                 | UT-01_2001                           |
| EU871528                 | RCV-A1_Australia_2007                |
| GQ166866                 | MRCV_USA_2001                        |
| HM623309                 | NJ-2009_China_2009                   |
| JF412629                 | HYD_China_Heilongjiang_2005          |
| JF438967                 | CB156_Portugal_1997                  |
| JX886001                 | CB194_Portugal_2006                  |
| JX886002                 | CB137_Portugal_1995                  |
| KF442961                 | Algarve1_Portugal_2013               |
| KF442962                 | Algarve3_Portugal_2013               |
| KF442963                 | 7-13Barrancos_Portugal_2013          |
| KF442964                 | 10A13Barrancos_Portugal_2013         |
| KF594473                 | Czechoslovakia-V351_1987             |
| KF594474                 | Turretfield_06_Australia_2006        |
| KF594475                 | Turretfield_07_Australia_2007        |
| KF594476                 | Turretfield_09_Australia_2009        |
| KF677011                 | STR2012_Poland/2012                  |
| KJ606958                 | Gungahlin_Australia_1998             |
| KJ606959                 | Parkwood_Australia_1998              |
| KJ943791                 | P95_Portugal_1996                    |
| KM115680                 | CBEstoi13-7_Portugal_2013            |
| KM115681                 | CBEstremoz14-1_Portugal_2014         |

|          |                                        |
|----------|----------------------------------------|
| KM115682 | CBEstremoz14-3_Portugal                |
| KM115683 | CBMora14-1_Portugal                    |
| KM115689 | CBMontemor14-1_Portugal_2014           |
| KM115697 | CBCoruche14-1_Portugal                 |
| KM115698 | CBCoruche14-2_Portugal_2014            |
| KM115711 | CBLavra10-13-1_Portugal_2013           |
| KM115712 | CBMert14-1_Portugal_2014               |
| KM115713 | CBMert14-2_Portugal_2014               |
| KM115714 | CBAlgarve14-1_Portugal                 |
| KM115715 | CBAlgarve14-3_Portugal                 |
| KM115716 | CBAlgarve14-4_Portugal                 |
| KM878681 | N11_Spain_2011                         |
| KM979445 | CBVal16_Portugal_2012                  |
| KP090974 | CB110_Portugal_1994                    |
| KP090975 | CB154_Portugal_1997                    |
| KP090976 | CBAnd1_Spain_2012                      |
| KP129395 | Rij06-12_Spain                         |
| KP129396 | Seg08-12_Spain                         |
| KP129397 | Tar06-12_Spain                         |
| KP129398 | Zar11-11_Spain_2010                    |
| KP129399 | Zar06-12_Spain                         |
| KP129400 | Bar01-11_Spain_2011                    |
| KP144789 | Pd_Poland/1989                         |
| KP144790 | KGM_Poland/1988                        |
| KP144791 | GRZ_2004_Poland_2004                   |
| KP144792 | BLA_Poland/1994                        |
| KT006721 | NZL/Canterbury/Lincoln/517/2013        |
| KT006722 | NZL/Canterbury/MackenzieBasin/95/2012  |
| KT006723 | NZL/HawkesBay/BoundaryStream/94/2012   |
| KT006724 | NZL/Canterbury/Hawarden/320/2013       |
| KT006725 | NZL/Otago/Queensberry/74/2013          |
| KT006726 | NZL/Otago/Taras/61/2014                |
| KT006727 | NZL/Otago/Luggate/67/2014              |
| KT006728 | NZL/Otago/Alexandra/64/2014            |
| KT006729 | NZL/Otago/Wanaka/63/2014               |
| KT006730 | NZL/Canterbury/MackenzieBasin/322/2013 |
| KT006731 | AUS/NSW/Hall/WAT1-13/2007              |
| KT006732 | AUS/NSW/Murrumbateman/BlueGums/2014    |
| KT006733 | AUS/WA/Gnowangerup/1999                |
| KT006734 | AUS/SA/FlindersRanges/1999             |
| KT006735 | AUS/WA/Bunbury/2000                    |
| KT006736 | AUS/SA/Robe/2000                       |
| KT006737 | AUS/SA/FlindersRanges/2002             |
| KT006738 | AUS/SA/OneTreeHill/2003                |
| KT006739 | AUS/SA/Coorong/2004                    |
| KT006740 | AUS/SA/BillaKallina/2004               |
| KT006741 | AUS/SA/Woodcroft/2005                  |
| KT006742 | AUS/SA/FlindersRanges/2006             |
| KT006743 | AUS/TAS/SouthArm/2007                  |
| KT006744 | AUS/SA/Hillbank/2008                   |
| KT006745 | AUS/SA/Bulgania/2009                   |
| KT006746 | AUS/WA/WonganHills/2012                |
| KT006747 | AUS/NSW/Grafton/2013                   |
| KT280058 | BlueGums-2_Australia_2015              |
| KT280059 | BLMT-2_Australia_2015                  |

|          |                        |
|----------|------------------------|
| KT280060 | BLMT-1_Australia_2015  |
| KT344770 | AUS/CSIRO/Master       |
| KT344771 | AUS/CSIRO/Working      |
| KT344772 | AUS/CSIRO/Release      |
| KT344773 | AUS/EMAI/Batch-1A      |
| KT344774 | AUS/EMAI/Batch-1D      |
| KT344775 | NZL/V351/Control       |
| KU882092 | GSK_Poland_1998        |
| KU882093 | MAL_Poland_1994        |
| KU882094 | OPO_Poland_2004        |
| KU882095 | ZD0_Poland_2000        |
| KX357653 | AUS/ACT/AIN-1/2009     |
| KX357654 | AUS/ACT/AIN-2/2009     |
| KX357655 | AUS/ACT/Gudg-26/2013   |
| KX357656 | AUS/ACT/Gudg-79/2014   |
| KX357657 | AUS/ACT/Gudg-89/2014   |
| KX357658 | AUS/ACT/GUN_1-240/2012 |
| KX357659 | AUS/ACT/GUN_1-29/2008  |
| KX357660 | AUS/ACT/GUN-121/2010   |
| KX357661 | AUS/ACT/GUN-159/2011   |
| KX357662 | AUS/ACT/GUN-160/2011   |
| KX357663 | AUS/ACT/GUN-238/2012   |
| KX357664 | AUS/ACT/GUN-343/2014   |
| KX357665 | AUS/ACT/GUN1-11/2007   |
| KX357666 | AUS/ACT/GUN1-22/2008   |
| KX357667 | AUS/ACT/GUN1-37/2009   |
| KX357668 | AUS/ACT/GUN1-52/2009   |
| KX357669 | AUS/ACT/GUN1-60/2010   |
| KX357670 | AUS/ACT/MtPt-2/2010    |
| KX357671 | AUS/ACT/MtPt-4/2010    |
| KX357672 | AUS/ACT/PI-1/2009      |
| KX357673 | AUS/NSW/BUR1-1/2007    |
| KX357674 | AUS/NSW/CAT_2-12/2007  |
| KX357675 | AUS/NSW/CAT_3-4/2007   |
| KX357676 | AUS/NSW/LWR-1/2010     |
| KX357677 | AUS/NSW/M2/2007        |
| KX357678 | AUS/NSW/M9/2007        |
| KX357679 | AUS/NSW/MIC3-3/2007    |
| KX357680 | AUS/NSW/MIC5-8/2007    |
| KX357681 | AUS/NSW/OAK_NT-12/2011 |
| KX357682 | AUS/NSW/OC-13/2007     |
| KX357683 | AUS/NSW/OC-15/2007     |
| KX357684 | AUS/NSW/OC-18/2007     |
| KX357685 | AUS/NSW/OC-20/2007     |
| KX357686 | AUS/NSW/OC-26/2007     |
| KX357687 | AUS/NSW/OC-33/2007     |
| KX357688 | AUS/NSW/OC-36/2007     |
| KX357689 | AUS/NSW/OC-39/2007     |
| KX357690 | AUS/NSW/OC-7/2007      |
| KX357691 | AUS/NSW/V-4/2007       |
| KX357692 | AUS/NSW/V-5/2007       |
| KX357693 | AUS/NSW/V-8/2007       |
| KX357694 | AUS/NSW/WAU-1/2009     |
| KX357695 | AUS/SA/OR383/2008      |
| KX357696 | AUS/VIC/BEN-10/2009    |

|             |                                                  |
|-------------|--------------------------------------------------|
| KX357697    | AUS/VIC/BEN-115/2010                             |
| KX357698    | AUS/VIC/BEN-124/2010                             |
| KX357699    | AUS/VIC/BEN-35/2009                              |
| KX357700    | AUS/VIC/BEN-52/2010                              |
| KX357701    | AUS/VIC/BM-2/2007                                |
| KX357702    | AUS/VIC/BM-35/2009                               |
| KX357703    | AUS/VIC/BM-45/2009                               |
| KX357704    | AUS/VIC/BM-49/2009                               |
| KX357705    | AUS/VIC/BM-60/2009                               |
| KX357706    | AUS/WA/B.Hill/2013                               |
| KX357707    | NZ/Southland/Gore-425A/2013                      |
| KX844830    | SCH04/China_2004                                 |
| KY171748    | Sch07/China_2007                                 |
| KY235675    | QC/Canada/WIN-AH-2016-OTH-0018_2016              |
| KY235676    | MB/Canada/WIN-AH-2011-OTH-026_2011               |
| KY235677    | Mexico/2718_Mexico                               |
| KY235678    | Korea/2719_Korea                                 |
| KY319031    | BIE_2015_Poland_2015                             |
| KY319032    | GLE_2013_Poland_2013                             |
| KY319033    | KRY_Poland_2004                                  |
| KY319034    | SKO_2013_Poland_2013                             |
| KY319035    | W147/05_Poland_2005                              |
| KY437668    | HB/Jingmei_China_2016                            |
| KY622127    | P158_Portugal_1998                               |
| KY622128    | P165_Portugal_1998                               |
| KY622129    | P175_Portugal_1999                               |
| KY628306    | AUS/NSW/ANN-1/2014/04                            |
| KY628307    | AUS/NSW/BER-1/2013/12                            |
| KY628308    | AUS/NSW/BER-10/2014/01                           |
| KY628309    | AUS/NSW/BER-2/2013/12                            |
| KY628310    | AUS/NSW/BER-3/2014/01                            |
| KY628311    | AUS/NSW/BER-4/2014/01                            |
| KY628312    | AUS/NSW/BER-8/2014/01                            |
| KY628313    | AUS/NSW/BLA-1/2014/07                            |
| KY628314    | AUS/NSW/GIR-1/2014/07                            |
| KY628315    | AUS/NSW/GIR-2/2014/07                            |
| KY628316    | AUS/NSW/KYO-1/2014/01                            |
| KY628317    | AUS/NSW/OAK-1/2015/02                            |
| KY628318    | AUS/NSW/OUR-1/2014/06                            |
| KY628319    | AUS/NSW/OUR-2/2014/06                            |
| KY628320    | AUS/NSW/WAL-1/2015/01                            |
| KY679902    | L145_Poland_2004                                 |
| KY679903    | RED1-2013_Poland_2013                            |
| KY679904    | STR2-2013_Poland_2013                            |
| KY679905    | STR2014_Poland_2014                              |
| KY765609    | P16_Portugal_1994                                |
| KY765610    | P19_Portugal_1994                                |
| KY765611    | P30_Portugal_1994/1995                           |
| LR899137    | RHDV/GER-BY/EI53-2.L03573/2019                   |
| LR899138    | RHDV/GER-SN/EI67.L03566/2017                     |
| LR899139    | RHDV/GER-BE/EI117-2.L03571/2018                  |
| LR899141    | RHDV/GER-NI/EI129-10.L03595/2019 (European hare) |
| LR899142*** | RHDV/GER-NW/EI17-1.L03577/2019 (European hare)   |
| LR899143    | RHDV/GER-HE/EI126-2.L03569/2018                  |
| LR899144    | RHDV/GER-BY/EI06-1.L03565/2019                   |

|          |                                  |
|----------|----------------------------------|
| LR899145 | RHDV/GER-BB/EI16-2.L03579/2019   |
| LR899146 | RHDV/GER-BE/EI83-2.L03575/2019   |
| LR899147 | RHDV/GER-BB/EI44.L03567/201      |
| LR899148 | RHDV/GER-BE/EI48.L03572/2019     |
| LR899149 | RHDV/GER-BE/EI175-1.L03570/2017  |
| LR899150 | RHDV/GER-RP/EI73-7.L03578/2018   |
| LR899151 | RHDV/GER-BE/EI31.L03574/2019     |
| LR899153 | RHDV/GER-NW/EI121.L03597/2017    |
| LR899154 | RHDV/GER-NI/EI125.L03568/2018    |
| LR899155 | RHDV/GER-RP/EI73-1.L03576/2018   |
| LR899156 | RHDV/GER-NI/EI07.L03593/2020     |
| LR899157 | RHDV/GER-BE/EI327.L03607/2016    |
| LR899158 | RHDV/GER-TH/EI15-1.L03598/2015   |
| LR899159 | RHDV/GER-NW/EI106.L03602/2016    |
| LR899160 | RHDV/GER-SN/EI176-1.L03604/2016  |
| LR899161 | RHDV/GER-NW/D102-2.L00436/2013   |
| LR899162 | RHDV/GER-BB/D66-15.L03609/2015   |
| LR899163 | RHDV/GER-NW/EI70-1.L03601/2016   |
| LR899164 | RHDV/GER-BW/EI11-5.L03608/2018   |
| LR899165 | RHDV/GER-TH/EI145-12.L03603/2016 |
| LR899166 | RHDV/GER-MV/EI220.L03605/2016    |
| LR899167 | RHDV/GER-NW/D160-1.L03612/2015   |
| LR899168 | RHDV/GER-SN/D166.L03611/2015     |
| LR899169 | RHDV/GER-SN/EI297-1.L03606/2016  |
| LR899170 | RHDV/GER-NW/EI15-7.L03600/2016   |
| LR899172 | RHDV/GER-SN/D107.L00439/2013     |
| LR899173 | RHDV/GER-RP/D87-2.L03610/2015    |
| LR899174 | RHDV/GER-TH/EI15-3.L03599/2016   |
| LR899175 | RHDV/GER-RP/D24.L00713/2014      |
| LR899176 | RHDV/GER-NW/D102-1.L00435/2013   |
| LR899177 | RHDV/GER-SN/D105-2.L00438/2013   |
| LR899179 | RHDV/GER-SH/D51-2.L00912/2014    |
| LR899180 | RHDV/GER-NW/D123-3.L00914/2014   |
| LR899181 | RHDV/GER-NW/D46-2.L00718/2014    |
| LR899183 | RHDV/GER-NW/D108-2.L00860/2014   |
| LR899184 | RHDV/GER-NW/D44.L00716/2014      |
| LR899186 | RHDV/GER-NW/D61-2.L00910/2014    |
| LR899189 | RHDV/GER-NW/D51-1.L00911/2014    |
| LR899190 | RHDV/GER-SN/EI205.L03564/2017    |
| LR899191 | RHDV/GER-TH/D101-2.L00903/2014   |
| LR899192 | RHDV/GER-BY/D35.L00714/2014      |
| LT168844 | 13-165_France_2013               |
| M67473   | FRG_Germany_1989                 |
| MF407651 | CBPico17-1_Portugal_2017         |
| MF407652 | CBPico17-2_Portugal_2017         |
| MF407653 | 16PLM1_Spain_2016                |
| MF407654 | PSM2_Portugal_2016               |
| MF407655 | CBMad17-1_Portugal_2017          |
| MF407656 | CBMad17-2_Portugal_2017          |
| MF407657 | CBMad17-3_Portugal_2017          |
| MF421563 | AUS/ACT/BLMT-3/2015              |
| MF421564 | AUS/ACT/AIN-3/2015               |
| MF421565 | AUS/TAS/BRK-1/2016               |
| MF421566 | AUS/VIC/CWS-1/2016               |

|          |                      |
|----------|----------------------|
| MF421567 | AUS/WA/GER-1/2016    |
| MF421568 | AUS/WA/GER-2/2016    |
| MF421569 | AUS/TAS/GRA-1/2016   |
| MF421570 | AUS/TAS/GEE-2/2016   |
| MF421571 | AUS/WA/GER-3/2016    |
| MF421572 | AUS/WA/GER-4/2016    |
| MF421573 | AUS/WA/GER-5/2016    |
| MF421574 | AUS/SA/MEA-1/2016    |
| MF421575 | AUS/SA/MUN-2/2016    |
| MF421576 | AUS/SA/TIN-2/2016    |
| MF421577 | AUS/SA/WIT-1/2016    |
| MF421578 | AUS/VIC/HAM-4/2016   |
| MF421579 | AUS/ACT/ATH-1/2015   |
| MF421580 | AUS/ACT/ARA-1/2015   |
| MF421581 | AUS/ACT/TUG-1/2015   |
| MF421582 | AUS/ACT/TUG-3/2015   |
| MF421583 | AUS/ACT/HACK-1/2015  |
| MF421584 | AUS/ACT/BLMT-6/2015  |
| MF421585 | AUS/ACT/MFBM-2/2015  |
| MF421586 | AUS/ACT/WC-2/2016    |
| MF421587 | AUS/ACT/MAJ-1/2016   |
| MF421588 | AUS/NSW/BIB-1/2016   |
| MF421589 | AUS/NSW/RUS-1/2016   |
| MF421590 | AUS/NSW/KYE-1/2016   |
| MF421591 | AUS/NSW/KYE-2/2016   |
| MF421592 | AUS/NSW/BG-5/2016    |
| MF421593 | AUS/NSW/BRH-1/2016   |
| MF421594 | AUS/NSW/BG-6/2016    |
| MF421595 | AUS/NSW/SGA-1/2016   |
| MF421596 | AUS/NSW/BG-7/2016    |
| MF421597 | AUS/SA/PAR-1/2015    |
| MF421598 | AUS/SA/CRA-1/2016    |
| MF421599 | AUS/SA/LYN-1/2016    |
| MF421600 | AUS/SA/MUN-1/2016    |
| MF421601 | AUS/SA/COO-1/2016    |
| MF421602 | AUS/SA/MAC-1/2016    |
| MF421603 | AUS/SA/KAL-1/2016    |
| MF421604 | AUS/SA/KAL-2/2016    |
| MF421605 | AUS/SA/LH-1/2016     |
| MF421606 | AUS/SA/MAC-2/2016    |
| MF421607 | AUS/SA/CV-1/2016     |
| MF421608 | AUS/SA/TUR-1607/2016 |
| MF421609 | AUS/SA/TUR-1606/2016 |
| MF421610 | AUS/SA/STR-1/2016    |
| MF421611 | AUS/SA/KAL-3/2016    |
| MF421612 | AUS/SA/MTO-2/2016    |
| MF421613 | AUS/SA/BLAK-1/2016   |
| MF421614 | AUS/SA/WS-1/2016     |
| MF421615 | AUS/SA/MTO-1/2016    |
| MF421616 | AUS/SA/LEA-1/2016    |
| MF421617 | AUS/SA/CRK-1/2016    |
| MF421618 | AUS/SA/BRA-1/2016    |

|          |                     |
|----------|---------------------|
| MF421619 | AUS/SA/COL-1/2016   |
| MF421620 | AUS/SA/COL-2/2016   |
| MF421621 | AUS/SA/ORO-1/2016   |
| MF421622 | AUS/VIC/HAM-1/2016  |
| MF421623 | AUS/VIC/HAM-2/2016  |
| MF421624 | AUS/VIC/TAW-1/2016  |
| MF421625 | AUS/VIC/TAW-2/2016  |
| MF421626 | AUS/VIC/HAM-3/2016  |
| MF421627 | AUS/VIC/BAH-1/2016  |
| MF421628 | AUS/WA/PIC-1/2016   |
| MF421629 | AUS/WA/CHI-1/2016   |
| MF421630 | AUS/WA/CHI-2/2016   |
| MF421631 | AUS/WA/PIC-2/2016   |
| MF421632 | AUS/WA/WNN-1/2016   |
| MF421633 | AUS/WA/MTBA-1/2016  |
| MF421634 | AUS/WA/MTBA-2/2016  |
| MF421635 | AUS/WA/WNP-1/2016   |
| MF421636 | AUS/ACT/HAR-1/2015  |
| MF421637 | AUS/ACT/THE-1/2016  |
| MF421638 | AUS/ACT/BON-2/2016  |
| MF421639 | AUS/NSW/TAR-2/2015  |
| MF421640 | AUS/NSW/MER-1/2015  |
| MF421641 | AUS/NSW/BOC-1/2015  |
| MF421642 | AUS/NSW/COW-1/2015  |
| MF421643 | AUS/NSW/ORAN-1/2015 |
| MF421644 | AUS/NSW/WES-1/2015  |
| MF421645 | AUS/NSW/EOR-1/2015  |
| MF421646 | AUS/NSW/HIL-1/2015  |
| MF421647 | AUS/NSW/BRO-1/2015  |
| MF421648 | AUS/NSW/BRO-2/2015  |
| MF421649 | AUS/NSW/BEGA-1/2015 |
| MF421650 | AUS/NSW/BEGA-2/2015 |
| MF421651 | AUS/NSW/FC-1/2015   |
| MF421652 | AUS/NSW/GOU-1/2015  |
| MF421653 | AUS/NSW/BERK-1/2016 |
| MF421654 | AUS/NSW/SWI-1/2016  |
| MF421655 | AUS/NSW/COB-1/2016  |
| MF421656 | AUS/NSW/MOL-1/2016  |
| MF421657 | AUS/NSW/KUL-1/2016  |
| MF421658 | AUS/NSW/CAR-4/2016  |
| MF421659 | AUS/NT/DAR-1/2015   |
| MF421660 | AUS/NT/ASP-1/2016   |
| MF421661 | AUS/SA/MBR-1/2015   |
| MF421662 | AUS/SA/ADL-1/2016   |
| MF421663 | AUS/SA/NUR-1/2016   |
| MF421664 | AUS/SA/ONK-1/2016   |
| MF421665 | AUS/SA/MUN-3/2016   |
| MF421666 | AUS/SA/MIL-1/2016   |
| MF421667 | AUS/SA/NAI-1/2016   |
| MF421668 | AUS/SA/ROB-1/2016   |
| MF421669 | AUS/SA/REY-1/2016   |
| MF421670 | AUS/SA/REY-2/2016   |

|          |                                     |
|----------|-------------------------------------|
| MF421671 | AUS/SA/KOO-1/2016                   |
| MF421672 | AUS/SA/GLE-1/2016                   |
| MF421673 | AUS/SA/BAL-2/2016                   |
| MF421674 | AUS/SA/BAL-3/2016                   |
| MF421675 | AUS/TAS/SPR-1/2016                  |
| MF421676 | AUS/VIC/KERANG-1/2015               |
| MF421677 | AUS/VIC/WAN-1/2015                  |
| MF421678 | AUS/VIC/WIL-1/2015                  |
| MF421679 | AUS/VIC/WIL-2/2015                  |
| MF421680 | AUS/VIC/NEW-1/2016                  |
| MF421681 | AUS/VIC/NEW-3/2016                  |
| MF421682 | AUS/VIC/NEW-2/2016                  |
| MF421683 | AUS/VIC/WAR-2/2016                  |
| MF421684 | AUS/VIC/AC-1/2016                   |
| MF421685 | AUS/VIC/AC-2/2016                   |
| MF421686 | AUS/VIC/DUN-1/2016                  |
| MF421687 | AUS/VIC/DUN-2/2016                  |
| MF421688 | AUS/VIC/DUN-3/2016                  |
| MF421689 | AUS/VIC/AWA-4/2016                  |
| MF421690 | AUS/VIC/THO-3/2016                  |
| MF421691 | AUS/VIC/AWA-1/2016                  |
| MF421692 | AUS/VIC/STO-1/2016                  |
| MF421693 | AUS/VIC/MLB-1/2016                  |
| MF421694 | AUS/VIC/CLC-1/2016                  |
| MF421695 | AUS/VIC/DON-1/2016                  |
| MF421696 | AUS/VIC/CAM-2/2016                  |
| MF421697 | AUS/WA/YOR-1/2016                   |
| MF421698 | AUS/WA/PTH-3/2016                   |
| MF421699 | AUS/WA/ALB-3/2016                   |
| MF421700 | AUS/WA/LES-1/2016                   |
| MF421701 | AUS/NSW/YAR-1/2015                  |
| MF598301 | K5_08Q712_BatchRelease1/2008        |
| MF598302 | AUS/NSW/CAR-3/2016                  |
| MG602005 | BBI_Poland_Mazowieckie_Apr-2017     |
| MG602006 | RED2016_Poland_Lodzkie_Set-2016     |
| MG602007 | VMS_Poland_West Pomeranian_Jun-2017 |
| MG763936 | SOS089_Portugal_2014                |
| MG763937 | SOS125_Portugal_2014                |
| MG763938 | SOS129_Portugal_2014                |
| MG763939 | SOS133_Portugal_2014                |
| MG763940 | SOS137_Portugal_2015                |
| MG763941 | SOS140_Portugal_2015                |
| MG763942 | SOS148_Portugal_2015                |
| MG763943 | SOS149_Portugal_2015                |
| MG763944 | SOS150_Portugal_2015                |
| MG763945 | SOS151_Portugal_2015                |
| MG763946 | SOS155_Portugal_2015                |
| MG763947 | SOS158_Portugal_2015                |
| MG763948 | SOS164_Portugal_2015                |
| MG763949 | SOS173_Portugal_2015                |
| MG763950 | SOS404_Portugal_2015                |
| MG763951 | SOS468_Portugal_2015                |
| MG763952 | SOS473_Portugal_2015                |



|          |                                                          |
|----------|----------------------------------------------------------|
| MG763953 | SOS474_Portugal_2015                                     |
| MG763954 | SOS492_Portugal_2016                                     |
| MH159170 | A17-62_Morocco_2017                                      |
| MH159171 | A17-69_Morocco_2017                                      |
| MH159172 | A17-63_Morocco_2017                                      |
| MH159173 | A17-73_Morocco_2017                                      |
| MH190418 | 00-21_G5                                                 |
| MK521927 | Buckbys Road/Tasmania/Sarcophilus_harrisii/2017/DN120446 |
| MK895974 | China_2014                                               |
| MN061492 | NL2016_Netherlands                                       |
| MN478485 | Alpine_musk_deer_China_2011                              |
| MN737113 | 10-28_France_2010                                        |
| MN737114 | 10-32_France_2010                                        |
| MN737115 | 06-11_France_2006                                        |
| MN737116 | JA34/09-48_France_2009                                   |
| MN737117 | CHA20/09-100_France_2009                                 |
| MN738377 | 16-35_France_2016                                        |
| MN746288 | JA10/08-10_France_2008                                   |
| MN746289 | BO25/08-133_France_2008                                  |
| MN786321 | 16-36_France_2016                                        |
| MN853658 | F77-3_Poland_2015                                        |
| MN853659 | LIB_Poland_2018                                          |
| MN853660 | PIN_Poland_2018                                          |
| MN853661 | WAK_Poland_2018                                          |
| MN901451 | Bremerhaven-17_Lepus_timidus_Germany_2017                |
| MT506233 | RHDV2/Apr2020/TX1_USA_2020                               |
| MT506234 | RHDV2/Mar2020/NM1_USA_2020                               |
| MT506235 | RHDV2/Mar2020/NY2_USA_2020                               |
| MT506236 | RHDV2/Mar2020/NY1_USA_2020                               |
| MT506237 | RHDV2/Apr2020/AZ1_USA_2020                               |
| MT586027 | SC2020/0401_China_2020                                   |
| MT628287 | 95-10_France_1995                                        |
| MT628288 | 05-01_G5_France_2005                                     |
| MT628289 | 09-02_France_2009                                        |
| MT628290 | 09-03_G5R_France_2009                                    |
| MT628291 | 16-09_France_2016                                        |
| MT819374 | 96-VLT000113_Sweden_1996                                 |
| MT819375 | 03-VLT001218_Sweden_2003                                 |
| MT819376 | 06-VLT001843_Sweden_2006                                 |
| MT819377 | 12-VLT000099_Sweden_2012                                 |
| MT819378 | 12-VLT000101_Sweden_2012                                 |
| MT819379 | 10-VLT001467_Sweden_2010                                 |
| MT833874 | Vulpes_vulpes_feces/Australia_2019                       |
| MW123059 | RT5-1_Nigeria_August_2020                                |
| MW194928 | GI.2/SG-NParks/2020/M54-9_Singapore_2020                 |
| MW467791 | AUS/GI.2_master_2016                                     |
| U54983   | RHDV-V351_1987                                           |
| X87607   | BS89_Italy_1989                                          |
| Z29514   | SD_France_1989                                           |
| Z49271   | RHDV-AST89_1989                                          |
| MZ913390 | Jedaïda_1/TUN/2019                                       |
| MZ913391 | Jedaïda_2/TUN/2019                                       |
| MZ913392 | Monastir_1/TUN/2018                                      |
| MZ913394 | Touza_1/TUN/2019                                         |
| MZ913395 | Touza_2/TUN/2019                                         |

|          |                      |
|----------|----------------------|
| MZ913393 | Rabbit_1512/TUN/2020 |
|----------|----------------------|
